# Supplementary material for: Rosemary Extract and Essential Oil as Drink Ingredients: An Evaluation of Their Chemical Composition, Genotoxicity, Antimicrobial, Antiviral, and Antioxidant Properties
Source: MDPI journal article supplement (doi:10.3390/foods10123143), 2021-12-18
Supplement: s1 [file s1]

Table S1: Results from essential oil and rosemary extracts toxicity experiments.

| Strain | NEGATIVE CONTROL | Rosemary EO (5%) | Rosemary extract (95%) | POSITIVE CONTROL |
|--------|------------------|------------------|------------------------|------------------|
| TA98   | Non toxic        | Non toxic        | Non toxic              | Toxic            |
| TA100  | Non toxic        | Non toxic        | Non toxic              | Toxic            |

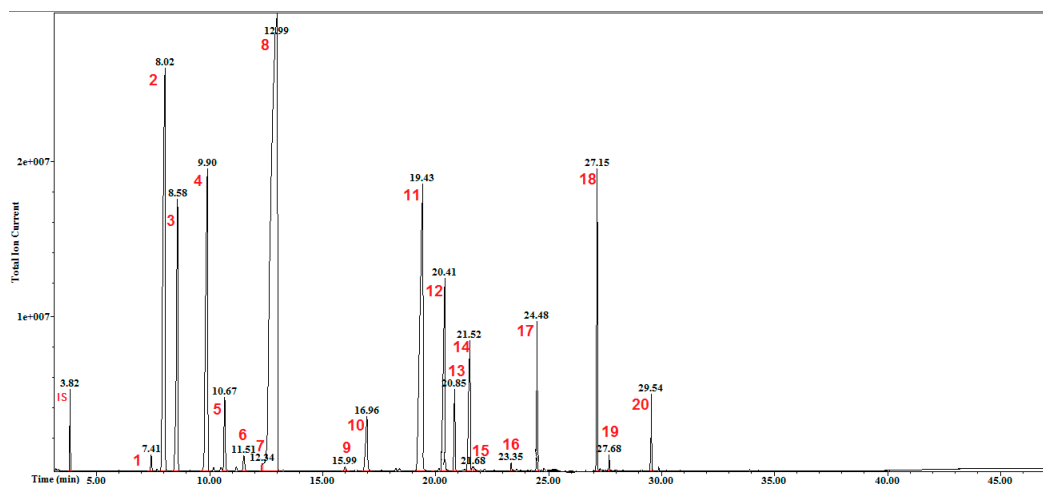

Figure S1: GC-MS chromatogram of rosemary essential oil

IS: Internal Standard (octane), 1: Tricyclene, 2:  $\alpha$ -Pinene, 3: Camphene, 4:  $\beta$ -Pinene, 5: Myrcene, 6: 3-Carene, 7: p-Cymene, 8:Eucalyptol (1-8 Cineole), 9: Terpinolene, 10: Linalool, 11: Camphor, 12:Borneol, 13: Terpinen-4-ol, 14:  $\alpha$ -Terpineol, 15:Myrtenol, 16:Carvone, 17: Bornyl acetate, 18: E- Caryophellene, 19:  $\alpha$ -Humulene, 20: Caryophellene oxide.
